# Supplementary material
Source: Elsevier journal article supplement (https://www.sciencedirect.com/science/article/pii/S0001651920300613)

**Material Suplementario,**

**Tabla 1,** Resultados de los estudios que han analizado el lymph node ratio (LNR) en pacientes con carcinomas escamosos de cabeza y cuello,

| **Autor** | **Año** | **Nº pacientes** | **Localización** | **% pN+** | **Técnica de categorización** | **Valores de corte LNR** | **Resultado** |
| --- | --- | --- | --- | --- | --- | --- | --- |
| Gil5 | 2009 | 386 | Cavidad oral | 43,2% | Mediana | 0,06 | Sup global y específica |
| Shrime25 | 2009 | 2.995* | Cavidad oral pN+ | 100% | Log rank test | 0,06/0,125 | Sup global |
| Shrime26 | 2009 | 143 | Cavidad oral pN+ | 100% | Log rank test | 0,06/0,13 | Sup global y específica |
| Süslü6 | 2010 | 142 | CECC pN+ | 100% | Mediana | 0,04 | Sup global y específica |
| Ebrahim24 | 2011 | 313 | Cavidad oral | 52,7% | Escala logarítmica | 0,025/0,075/0,20 | Sup global y específica |
| Kim43 | 2011 | 78 | Cavidad oral pN+ | 100% | Literatura | 0,06 | Sup global y específica |
| Lanzer27 | 2012 | 291 | CECC | 62,5% | Log rank test | 0,06/0,13 | Sup global y específica |
| Liao28 | 2012 | 457 | CECC pN+ | 100% | Log rank test | 0,16 | Sup específica y rN |
| Kim4 | 2012 | 95 | Cavidad oral | 32,6% | Media | 0,04 | Sup global |
| Yu7 | 2013 | 279 | Hipofaringe (post QT-RT) | 84,7% | Mediana | 0,04 | Sup global y específica |
| Cuartiles | 0,0/0,04/0,14 |
| Wang15 | 2013 | 916* | Hipofaringe pN+ | 100% | Log rank test | 0,05/0,30 | Sup global y específica |
| Terciles | 0,09/0,27 |
| Sayed29 | 2013 | 725 | Cavidad oral pN+ | 100% | Log rank test | 0,088 | Sup global y específica, rT, rN |
| Urban44 | 2013 | 3.091* | Cavidad oral pN+ | 100% | Literatura | 0,065/0,125 | Sup global |
| Mizrachi30 | 2013 | 71 | Cutáneo pN+ | 100% | Log rank test | 0,10 | Sup global y específica |
| Patel19 | 2013 | 4.254* | Cavidad oral | 46,7% | ROC | 0,07 | Sup global y específica |
| Wang16 | 2014 | 1.963* | Laringe pN+ | 100% | Log rank test | 0,09/0,20 | Sup global y específica |
| Terciles | 0,06/0,23 |
| Ryu20 | 2014 | 71 | Laringe pN+ | 100% | ROC | 0,044 | Sup específica |
| Rudre45 | 2014 | 38 | CECC (estadios III-IV) pN+ | 100% | Literatura | 0,20 | Sup global y específica |
| Park21 | 2014 | 39 | N sin T | 100% | ROC | 0,14 | Sup global y específica |
| Prabhu31 | 2014 | 350 | Cavidad oral | 46,0% | Log rank test | 0,20 | Sup global y rN |
| Reinisch32 | 2014 | 291 | CECC | 62,5% | Log rank test | 0,06/0,13 | Sup global y específica |
| Künzel8 | 2014 | 374 | Cavidad oral pN+ | 100% | Mediana | 0,07 | Sup global y específica |
| Künzel17 | 2014 | 384 | Orofaringe pN+ | 100% | Cuartiles | 0,04/0,09/0,17 | Sup específica |
| Clusters | 0,04/0,06/0,08/0,10 |
| Ampil9 | 2014 | 34 | CECC pN1 | 100% | Mediana | 0,05 | Sup específica |
| Yildiz33 | 2015 | 225 | CECC | 56,4% | Log rank test | 0,10 | Sup global |
| Lee46 | 2015 | 347 | Cavidad oral | 32,3% | Literatura | 0,2/0,4 | Sup global |
| Barzan47 | 2015 | 779 | CECC | 48,9% | Literatura | 0,01/0,07 | rN |
| Chan34 | 2015 | 57 | Nasofaringe rN+ | 100% | Log rank test | 0,10/0,15 | Sup global y rN |
| Chen35 | 2015 | 141 | CECC pN+ | 100% | Log rank test | 0,2/0,4 | Sup global |
| Chen13 | 2015 | 117 | CECC | 53,8% | Mediana pN+ | 0,1 | Sup global |
| Künzel18 | 2015 | 202 | Laringe pN+ | 100% | Cuartiles | 0,05/0,08/0,15 | Sup global y específica |
| Clusters | 0,05/0,07/0,09 |
| ROC | 0,08/0,10 |
| Ong48 | 2015 | 99 | Lengua | 42,4% | Literatura | 0,06 | Sup global y específica |
| Park36 | 2015 | 64 | Amígdala pN+ | 100% | Log rank test | 0,05 | Sup global y específica |
| Joo22 | 2015 | 105 | Hipofaringe | 80,0% | ROC | 0,055 | Sup global y específica |
| Hua49 | 2015 | 81 | Hipofaringe | 79,0% | Literatura | 0,10 | Sup global |
| Imre37 | 2015 | 101 | Laringe pN+ | 100% | Log rank test | 0,09 | Sup global y específica |
| Suzuki38 | 2016 | 35 | Cavidad oral pN+ | 100% | Log rank test | 0,07 | Sup global y rM |
| Suzuki39 | 2016 | 46 | Hipofaringe pN+ | 100% | Log rank test | 0,09 | Sup global y específica |
| Tseros40 | 2016 | 238 | Cutáneo pN+ | 100% | Log rank test | 0,21 | Sup global y específica |
| Lieng41 | 2016 | 72 | Lengua pN+ | 100% | Log rank test | 0,143 | Sup global y específica |
| Roberts50 | 2016 | 12.437* | CECC | 57,5% | Literatura | 0,06/0,125 | Sup global |
| Riddler51 | 2016 | 176 | CECC pN+ | 100% | Literatura | 0,07 | Sup global |
| Jacobi10 | 2017 | 137 | Orofaringe pN+ | 100% | Mediana | 0,10 | Sup global y específica |
| Meyer11 | 2017 | 88 | Orofaringe | 72,7% | Mediana | 0,07 | Su global (HPV-) |
| Kim14 | 2017 | 316 | Cavidad oral | 34,4% | Mediana pN+ | 0,06 | Sup global |
| Chow52 | 2017 | 39 | Mucosa yugal | 48,7% | Literatura | 0,07 | Sup global |
| Samani53 | 2018 | 201 | CECC pN+ | 100% | Literatura | 0,06 | Sup global y específica |
| Rempel54 | 2018 | 171 | Cavidad oral (post QT-RT) | 80,1% | Literatura | 0,07 | Sup global |
| Hingsammer12 | 2018 | 88 | Lengua | 51,1% | Mediana | 0,06 | - |
| Agarwall42 | 2019 | 94 | Cavidad oral pN+ | 100% | Log rank test | 0,12 | Sup global y específica |
| Ye23 | 2019 | 93 | Hipofaringe | 83,8% | ROC | 0,07 | Sup global y específica |

* Resultados obtenidos de registros poblacionales de tumores

**Figura 1,** Curvas de supervivencia especifica en función de la categoría del valor del *lymph node ratio* (LNR) para los pacientes que no habían recibido un tratamiento previo con quimioterapia de inducción (n=767).


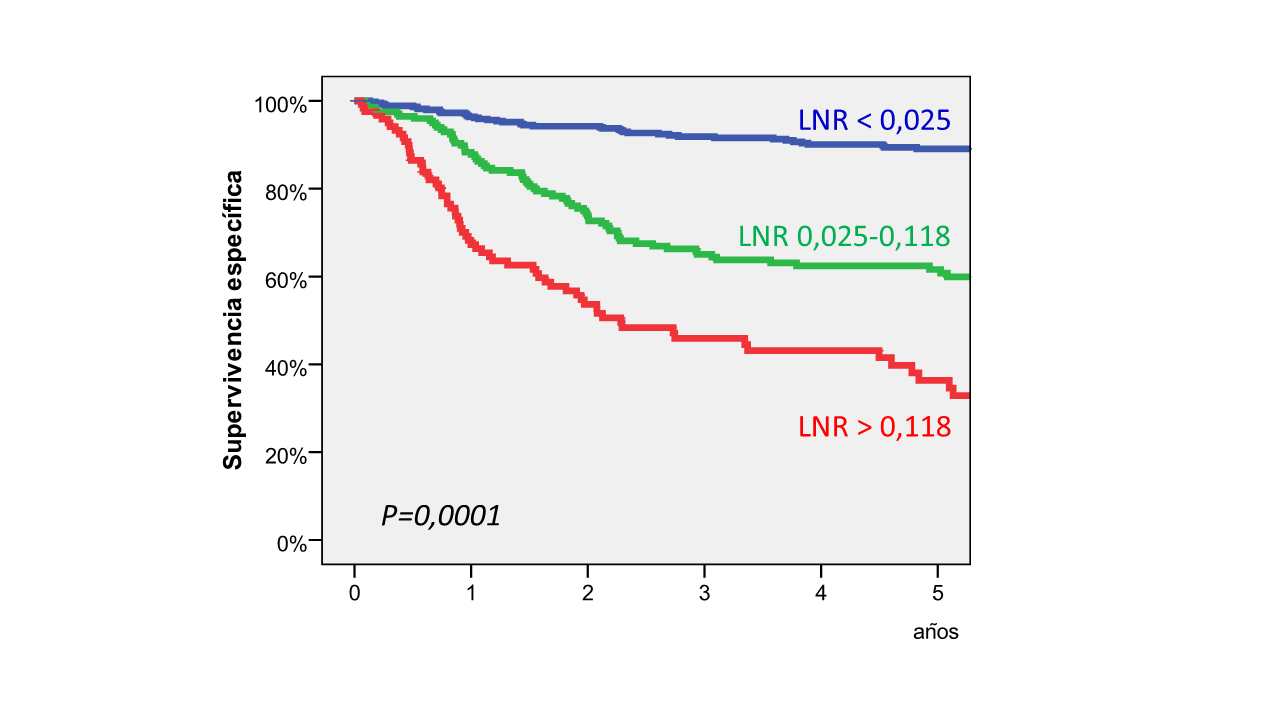


**Figura 2,** Curvas de supervivencia especifica en función de la categoría del valor *del lymph node ratio* (LNR) para los pacientes que habían recibido un tratamiento previo con quimioterapia de inducción (n=544).


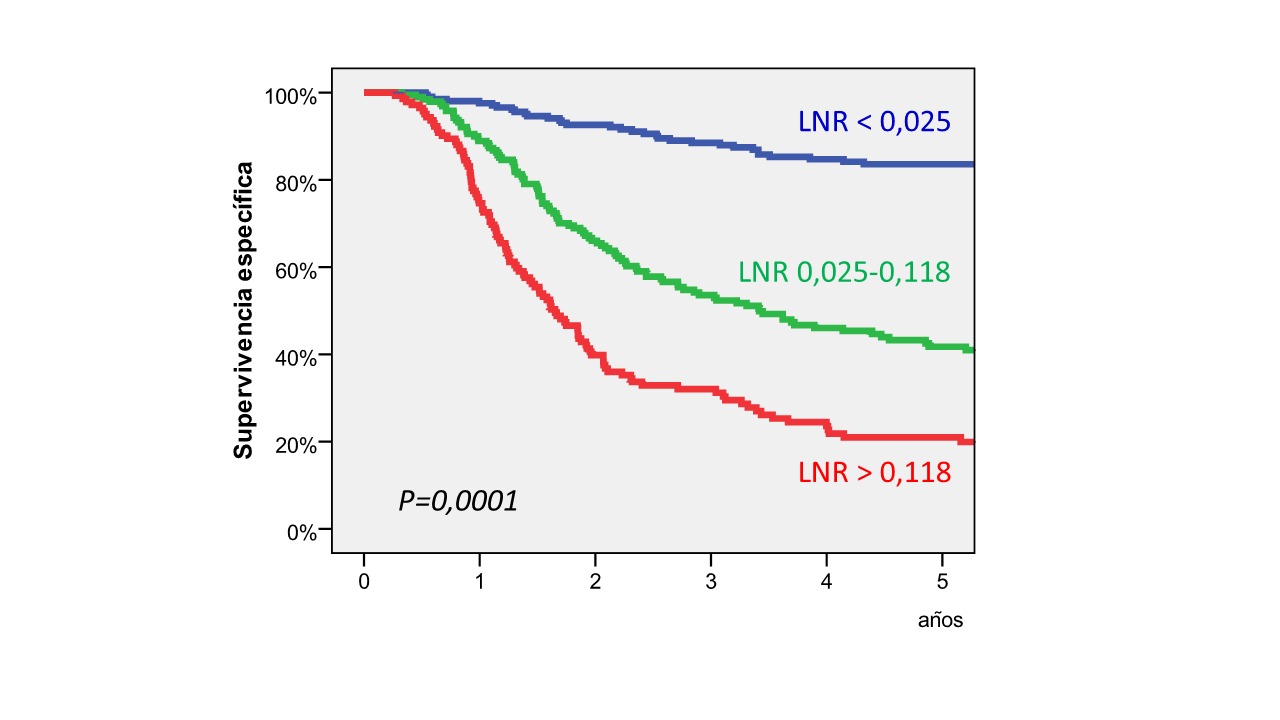

Supplement: mmc1 [file S0001651920300613:mmc1.docx]
